# Supplementary material for: The Microevolution and Epidemiology of Staphylococcus aureus Colonization during Atopic Eczema Disease Flare
Source: PubMed Central journal article supplement (PMC5780352; doi:10.1016/j.jid.2017.09.023), 2018-02
Supplement: mmc2.pdf [file mmc2.pdf]

Figure S1

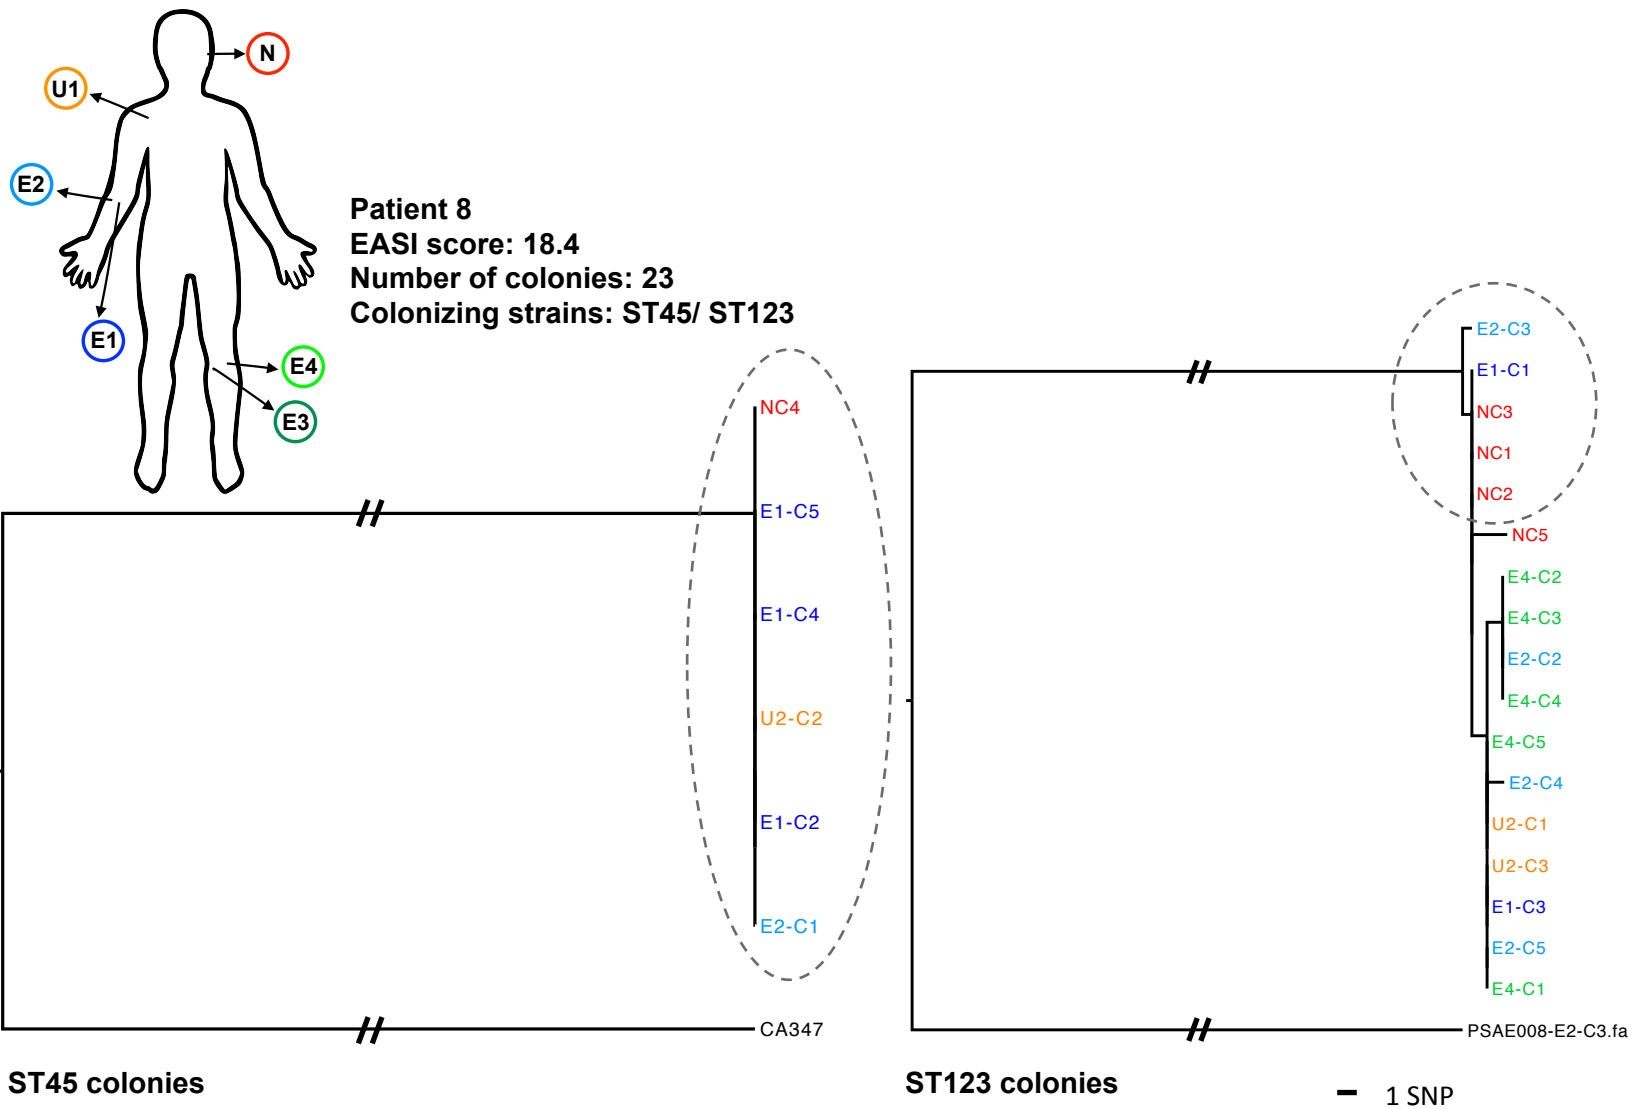

**Figure S1 Self-transmission and co-colonization.**

*Colonization by two distinct STs in Patient 8 (study ID PSAE008).* Maximum likelihood core SNP tree of colonies from 4 body sites. Both strains are present nasally and extra-nasally. Branch label coloring corresponds to body site, marked on diagram. Perforated lines indicate overlapping spread between body sites. ST45 colonies are genetically identical. ST45 colony tree routed using CA347 reference; ST123 colony tree rooted used self-reference of E2-C3 colony assembly. Branch labels: E1/ 3- lateral border of single eczema site. E2/4- medial border of single eczema site. SNP bar is indicated for scale (not applicable to root branches with strikethrough).

Figure S2

a

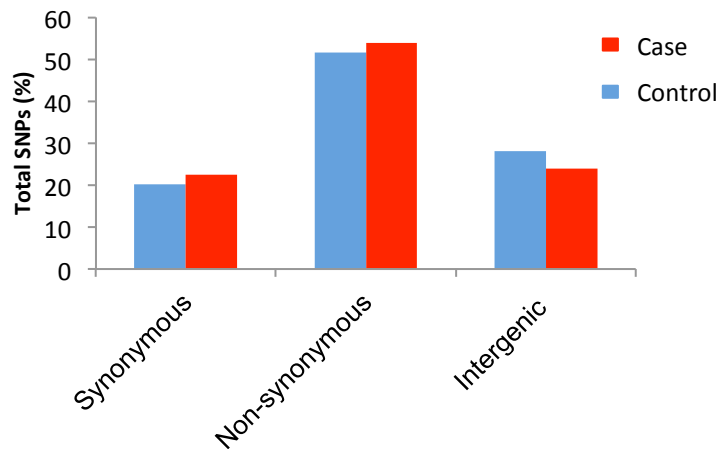

b

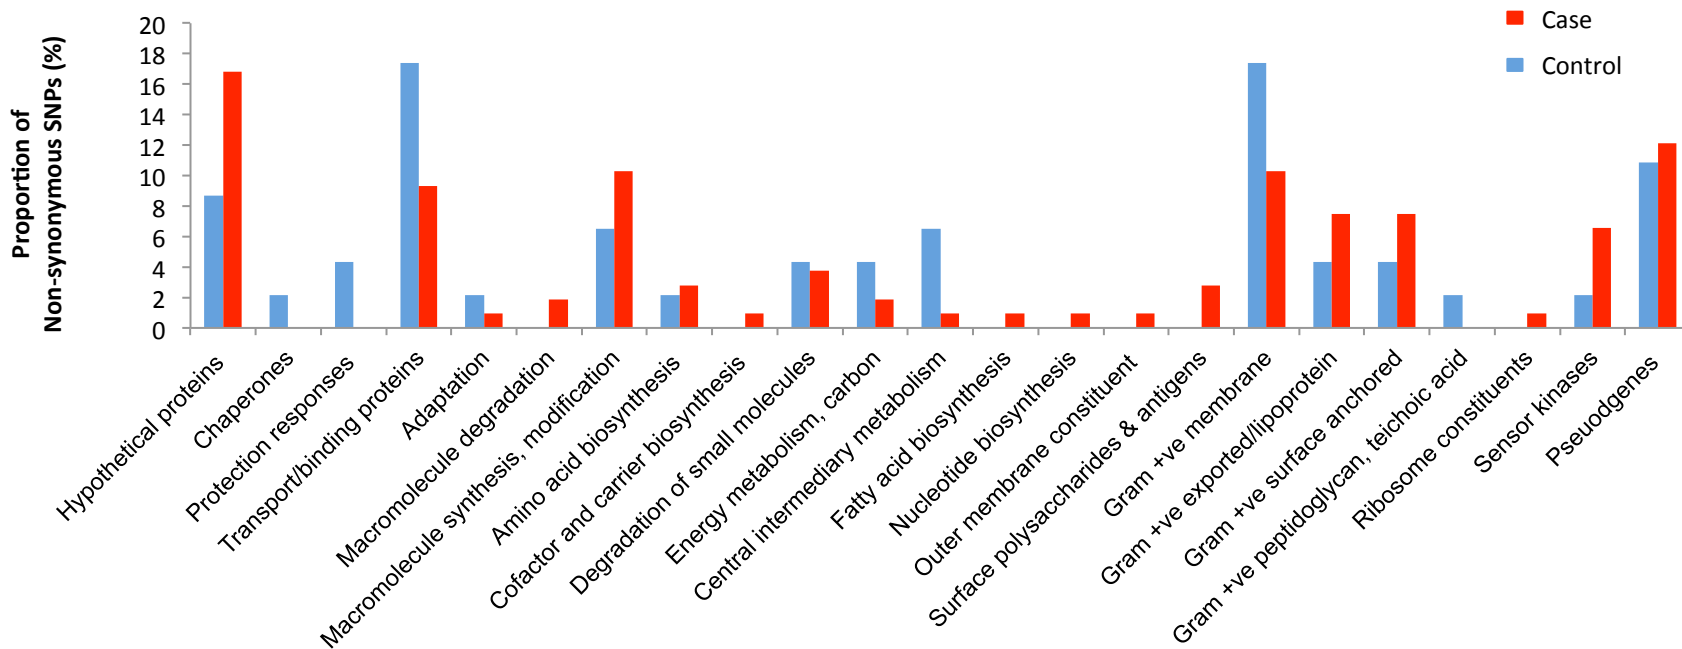

**Figure S2 Distribution of SNPs by type and functional gene classification**

(a) Distribution of SNP types occurring between cases and controls (total number of SNPs =285). (b) Distribution of non-synonymous base substitutions by functional gene class (n= 152) across the *S. aureus* genome.
